# Supplementary material
Source: Springer Nature journal article supplement (https://www.springermedizin.de/resource/supplementary/12889_2011_3747_MOESM2_ESM.pdf/9491692)
Supplement: MOESM2 [file 9491692]

Enrollment

Allocation

Follow-Up

Analysis

Assessed for eligibility  
by attending physician

Distribution of respondent  
flyers

Assessed for eligibility  
by researcher

Exclusion  
Absenteeism > 1,5 year  
Fulltime students, informal  
caregivers and/or volunteers

Baseline  
assessment  
(T0)

Quasi  
experiment

Randomised controlled trial  
(RCT)

Guidance to excel in return to  
work (UM)

Work in general practice (UMC  
St Radboud)

Musculoskeletal and mental  
health complaints (Second  
Care / Care for Companies)

Integrated care  
intervention for workers  
with rheumatoid arthritis  
(Vumc, EMGO+)

Musculoskeletal  
problems (Health &  
Motion)

Allocation to  
Employability  
Intervention

Allocation to  
Care as Usual  
Group

Allocation to  
Employability  
Intervention

Allocation to  
Care as Usual  
Group

Outcome measure at 6  
months  
(T1)

12 & 18 months Follow-Up  
(FU1 & FU2)

Statistic and  
Economic  
Analysis
